# Supplementary figures and images for: Rituximab in the treatment of Graves’ orbitopathy: latest updates and perspectives
Source: PubMed Central journal article supplement — Endocr Connect. 2022 Oct 11;11(12):e220303. doi: 10.1530/EC-22-0303 (PMC9716394; doi:10.1530/ec-22-0303), 2022-10-11

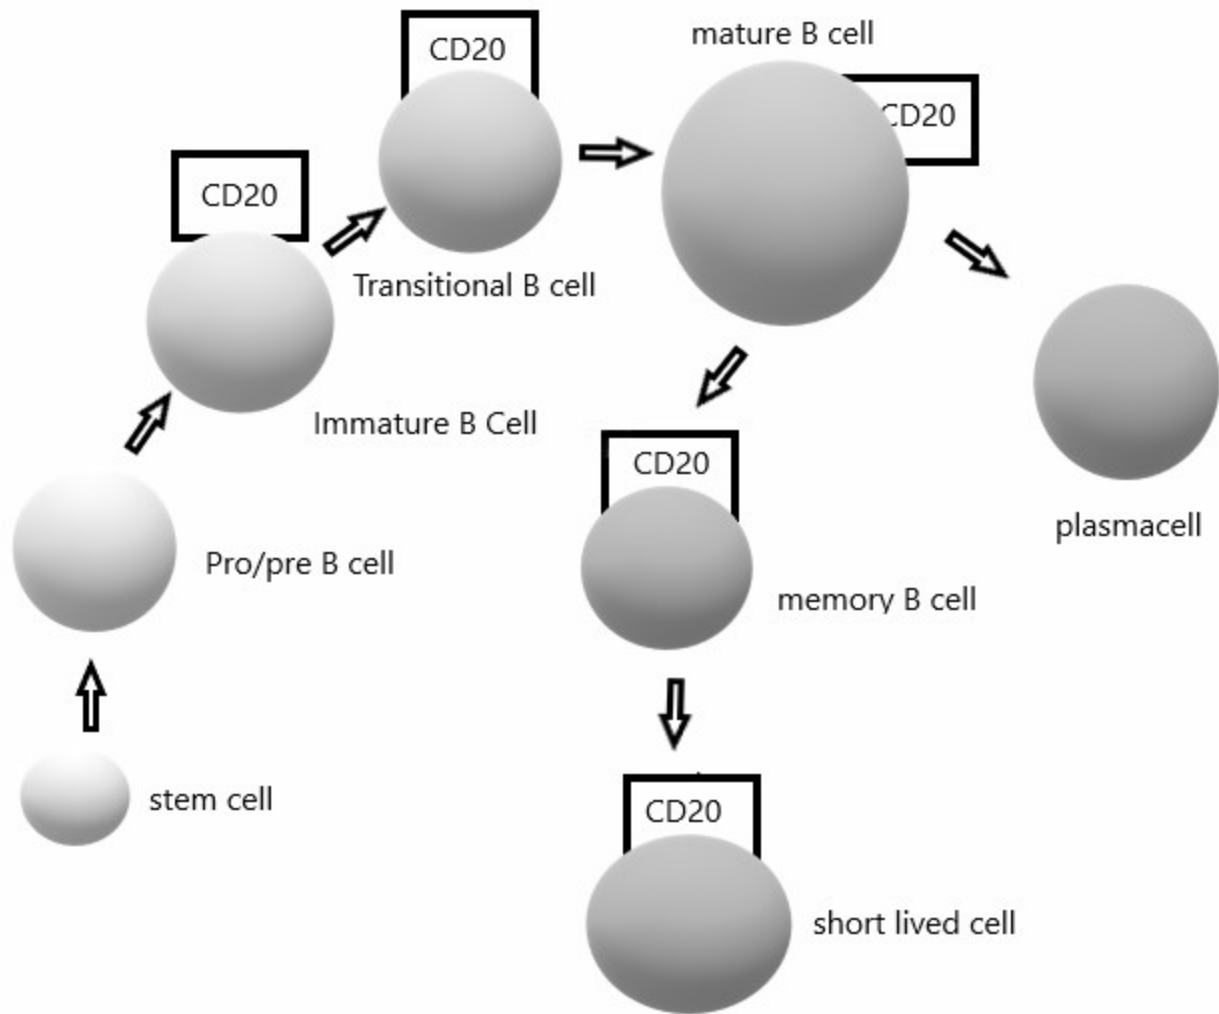

Fig. 2 B-cell development cycle

Supplement: supplementary_figure_1.pdf [file supplementary_figure_1.pdf]
